# Supplementary material
Source: PubMed Central journal article supplement (PMC8825300)
Supplement: kiab508_supplementary_data.pdf [file kiab508_supplementary_data.pdf]

**A**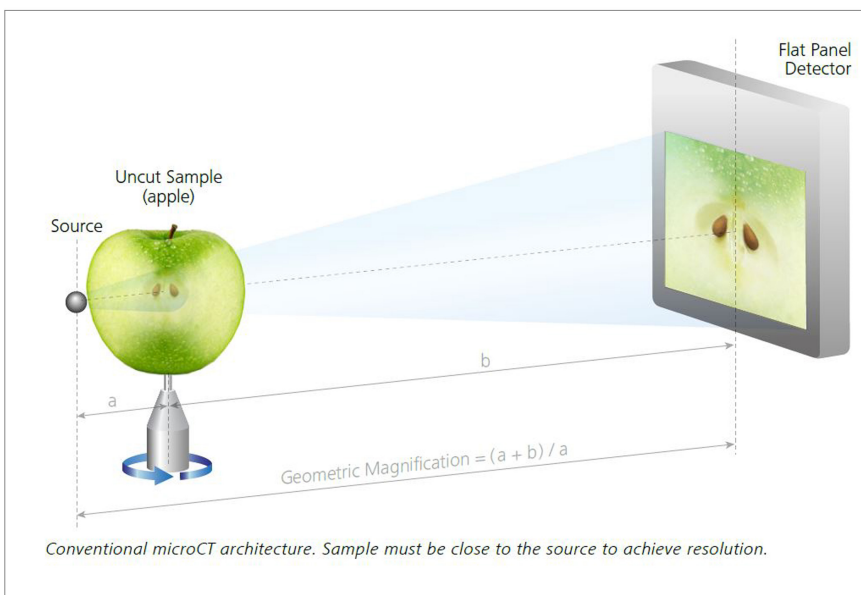**B**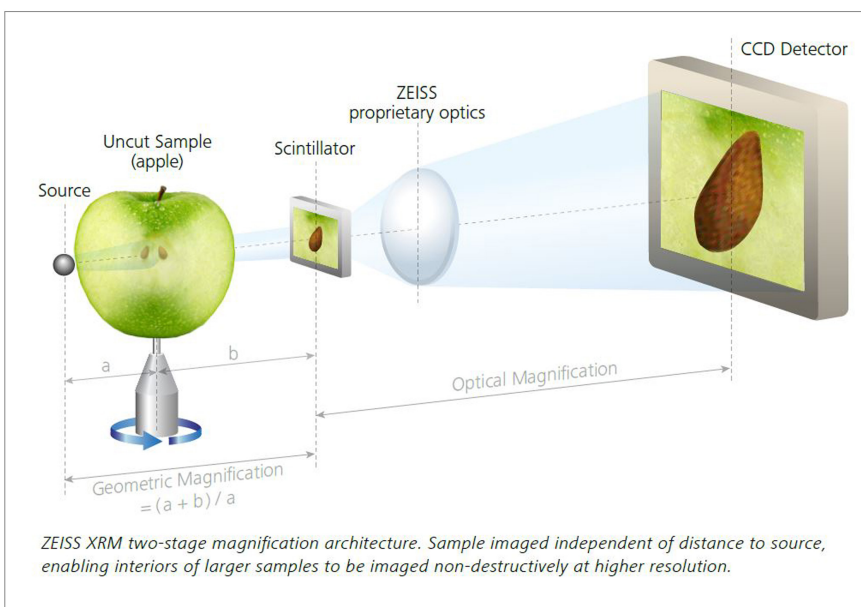

**Supplemental Figure S1.** X-ray computed tomography (XCT) and X-ray microscopy (XRM)

**A** Diagram illustrating conventional XCT architecture where source-sample-detector geometry constrains the magnification range that can be achieved. **B** Diagram showing how the addition of an objective lens into the X-ray beam path, typical of XRM instruments, allows greater magnification compared to conventional XCT. Diagrams used with permission from Carl Zeiss X-ray Microscopy Inc., Dublin, California, USA.
